# Supplementary material
Source: Springer Nature journal article supplement (https://www.springermedizin.de/resource/supplementary/13601_2012_292_MOESM5_ESM.pdf/9677824)

**a** naive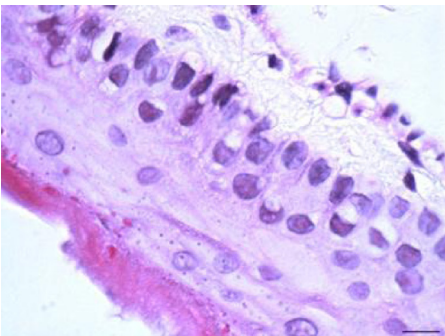**b** Sham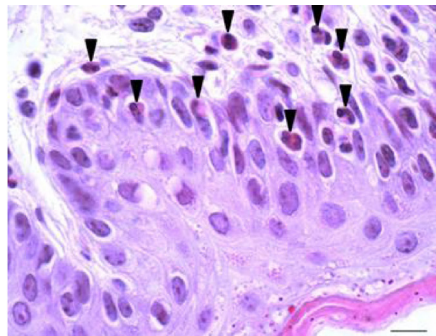**c** EPIT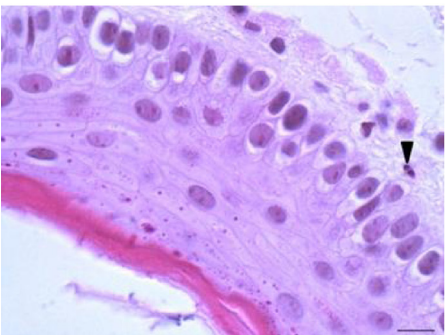**d** stripping + EPIT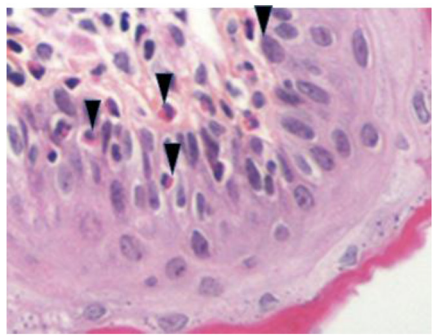**e** eosinophil infiltration into esophagus mucosa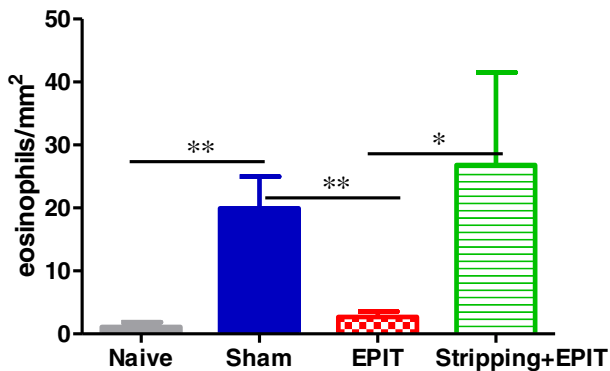

Supplement: MOESM5 [file 9677824]
